# Supplementary material for: Euro-Atlantic winter storminess and precipitation extremes under 1.5 °C vs. 2 °C warming scenarios
Source: Copernicus journal article supplement (doi:10.5194/esd-9-679-2018), 2018-06-05
Supplement: Supplementary file [file esd-9-679-2018-supplement.pdf]

Supplement of Earth Syst. Dynam., 9, 679–699, 2018  
<https://doi.org/10.5194/esd-9-679-2018-supplement>  
© Author(s) 2018. This work is distributed under  
the Creative Commons Attribution 4.0 License.

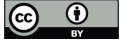

*Supplement of*

## **Euro-Atlantic winter storminess and precipitation extremes under 1.5 °C vs. 2 °C warming scenarios**

**Monika J. Barcikowska et al.**

*Correspondence to:* Monika J. Barcikowska ([mbarcikowska@edf.org](mailto:mbarcikowska@edf.org))

The copyright of individual parts of the supplement might differ from the CC BY 4.0 License.

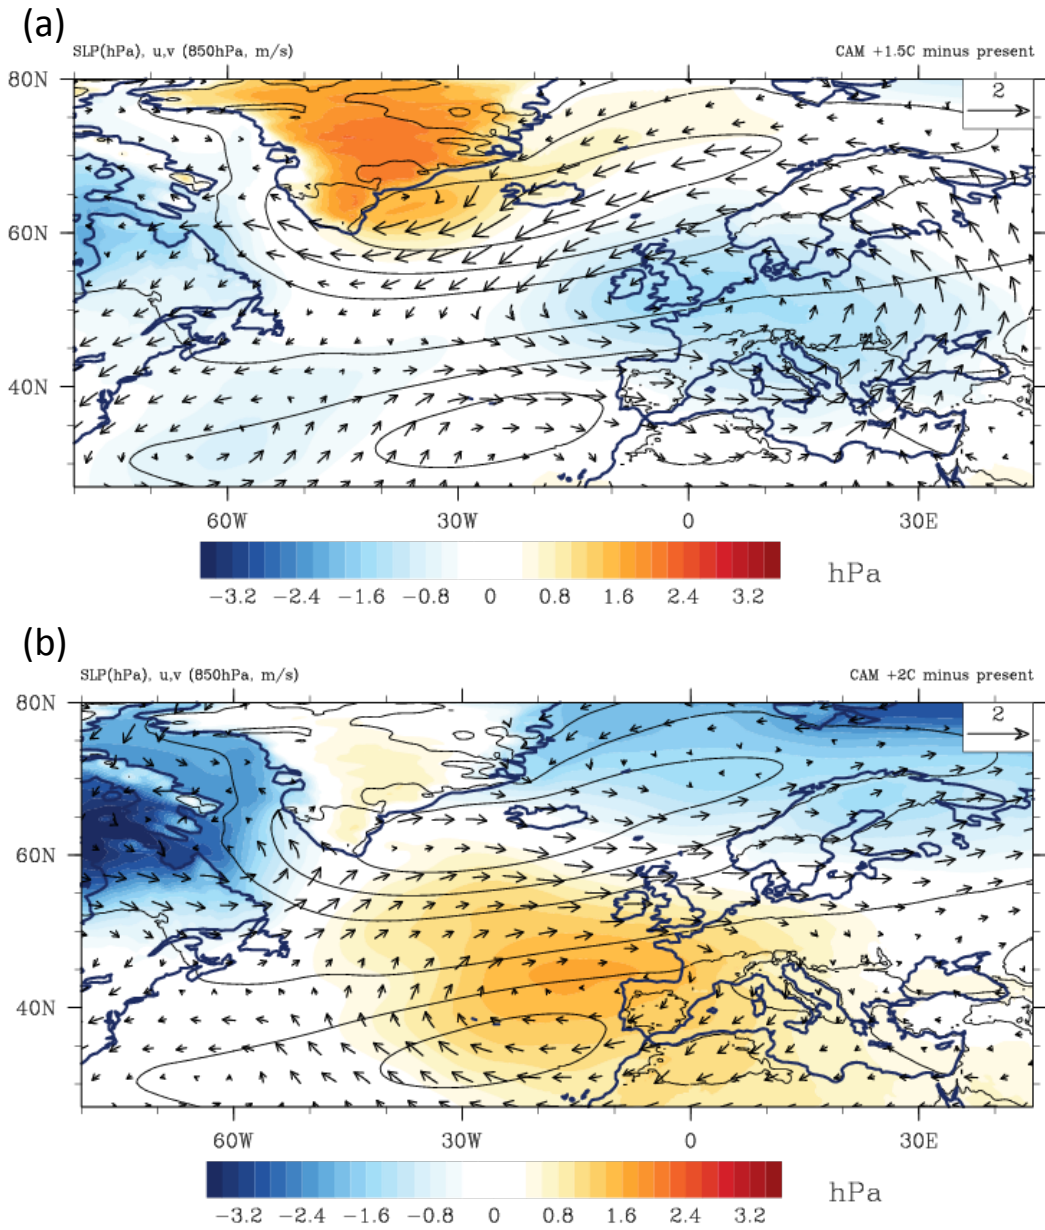

**Figure S1. Difference between a) +1.5°C; b) +2°C and present climate (2006-2015) for DJF sea level pressure [shaded, hPa] and wind vector at 850hPa [shaded, m s<sup>-1</sup>].**

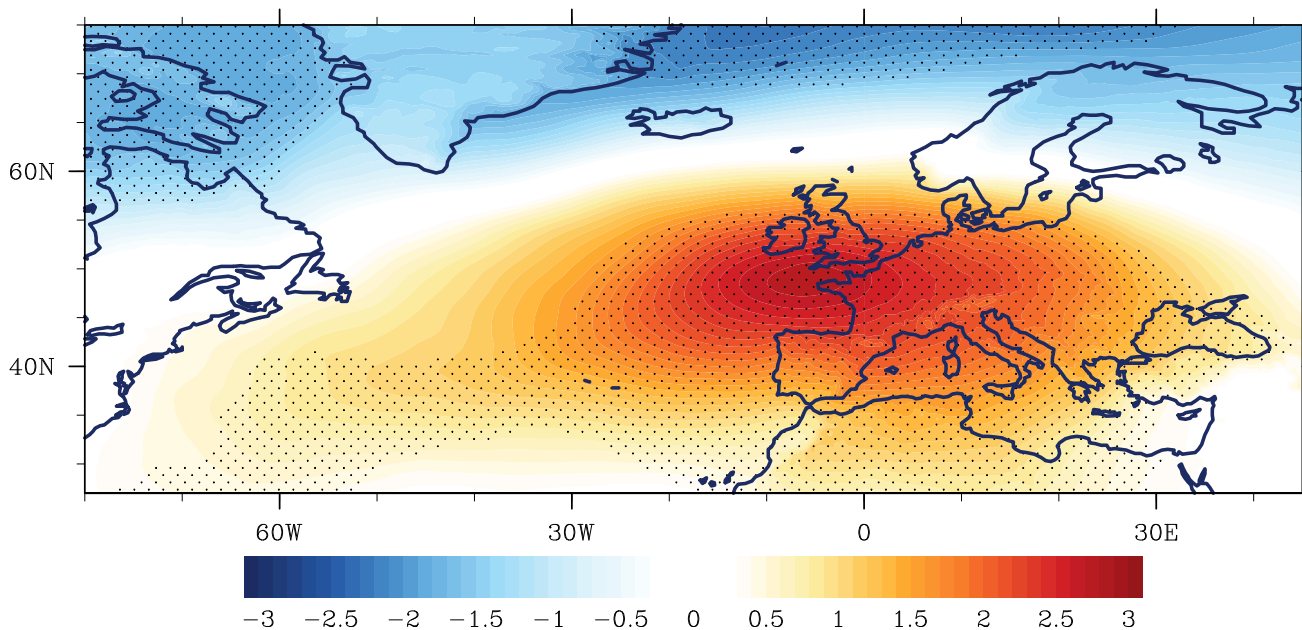

**Figure S2. Difference between +2°C and +1.5°C experiments for DJF a) sea level pressure [shaded, hPa] in CAM5.1.2 0.25°x0.25° lat-lon resolution. Regions are stippled, where the difference is significant at 5% level.**

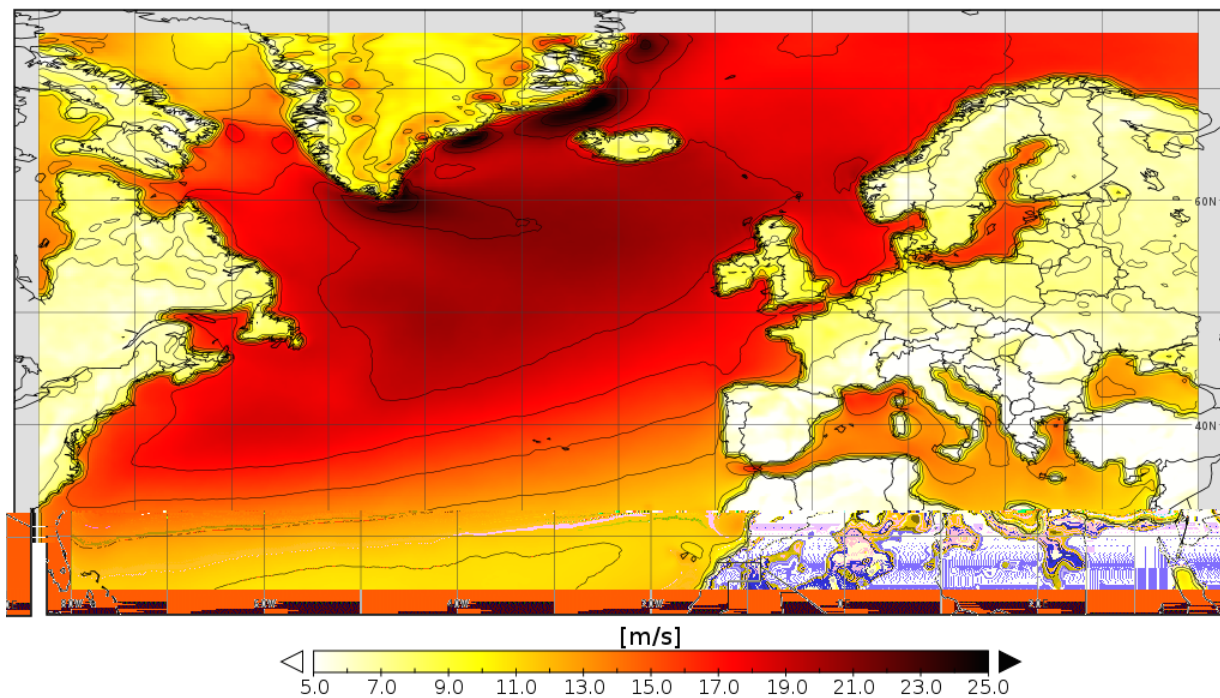

**Figure S3 Winter (DJF) climatology of 95<sup>th</sup> percentile of daily winds, derived for period 1979-2005 in CAM5\_0.25.**
